# Supplementary material for: Sulfonate ligand-induced formation of alkali metal–cucurbit[5]uril-based assemblies
Source: Royal Society of Chemistry journal article supplement (doi:10.1039/d2ce01568d), 2023-01-01
Supplement: d2ce01568d1.pdf [file d2ce01568d1.pdf]

## Sulfonate Ligands-Induced Formation of Alkali Metal - Cucurbit[5]uril-based Assemblies

Jing Xu<sup>\*a</sup>, Qi Wang<sup>a</sup>, Wei-Wei Ge<sup>a</sup>, Dong Wu<sup>\*b</sup>, Carl Redshaw<sup>c</sup>, Kai Chen<sup>\*a</sup>

<sup>a</sup> Collaborative Innovation Center of Atmospheric Environment and Equipment Technology; Jiangsu Key Laboratory of Atmospheric Environment Monitoring and Pollution Control; School of Chemistry and Materials Science, Nanjing University of Information Science and Technology, Nanjing 210044, P. R. China. Email: [xujing2003246@163.com](mailto:xujing2003246@163.com) and [kaichen85@nuist.edu.cn](mailto:kaichen85@nuist.edu.cn)

<sup>b</sup> Computer Aided Drug Discovery Center, Zhuhai Institute of Advanced Technology, Chinese Academy of Sciences, Zhuhai 519003, China. [wudong@ziate.ac.cn](mailto:wudong@ziate.ac.cn)

<sup>c</sup> Department of Chemistry, School of Natural Sciences, University of Hull, Hull HU6 7RX, UK.

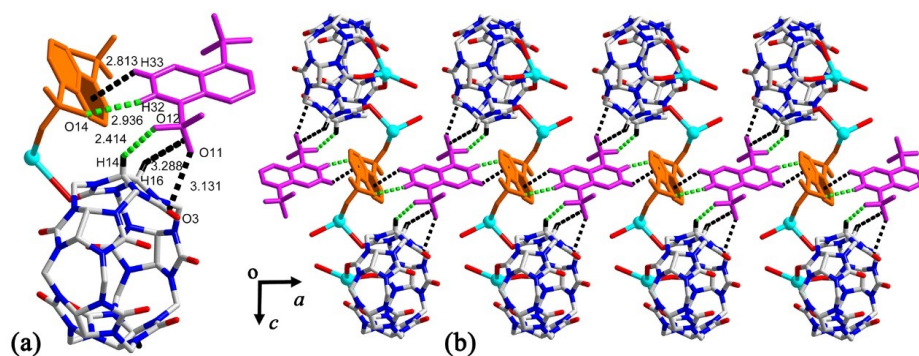

**Fig. S1** (a) The interaction among the sulfonate ligands 1,5-NAS<sup>2-</sup> and the outer surface of Q[5] molecules; (b) The ternary Q[5]-Na<sup>+</sup>-1,5-NAS<sup>2-</sup> supramolecular chain.

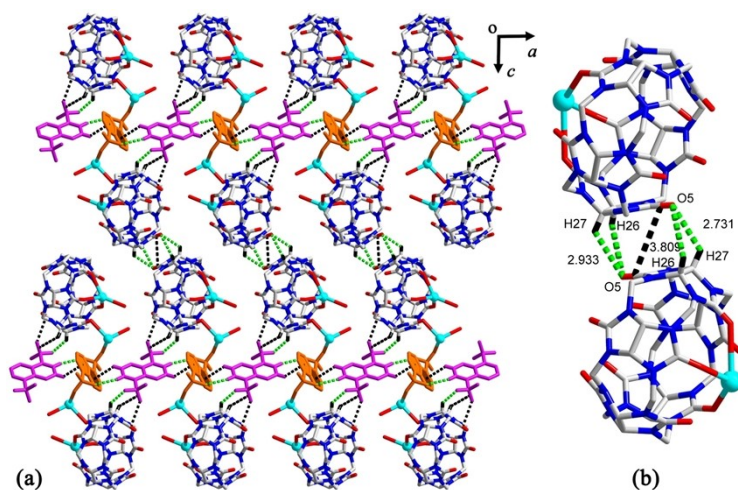

**Fig. S2.** (a) The 2D supramolecular layer (a) constructed from the Q[5]-Na<sup>+</sup>-1,5-NAS<sup>2-</sup> chains through the hydrogen bonding interactions between adjacent Q[5] (b).

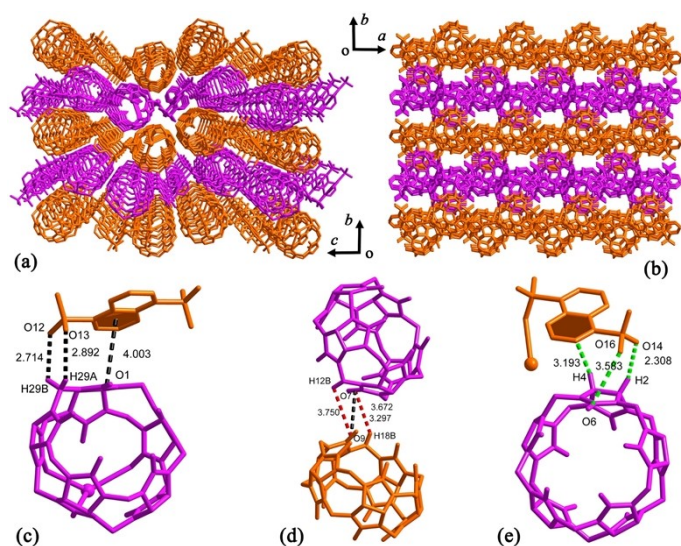

**Fig.S3.** The 3D supramolecular structure of assembly **3** along (a) *a*-axis; (b) and *c*-axis; (c) through the noncovalent interactions between Q[5]s (d) and those between Q[5] and NDS<sup>2-</sup> (c, e).

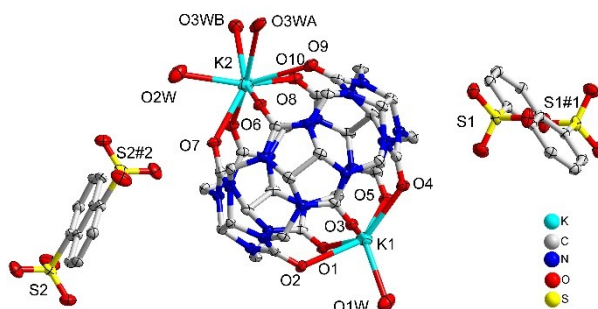

**Fig. S4.** The coordination environment of Na<sup>+</sup> in assembly **3** with displacement ellipsoids drawn at the 50% probability level. Hydrogen atoms was omitted for clarity.

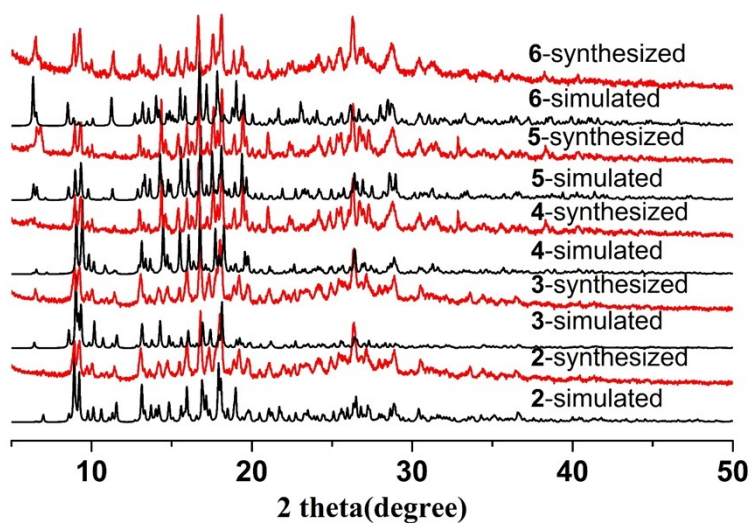

**Fig. S5** PXRD patterns of 2-6.

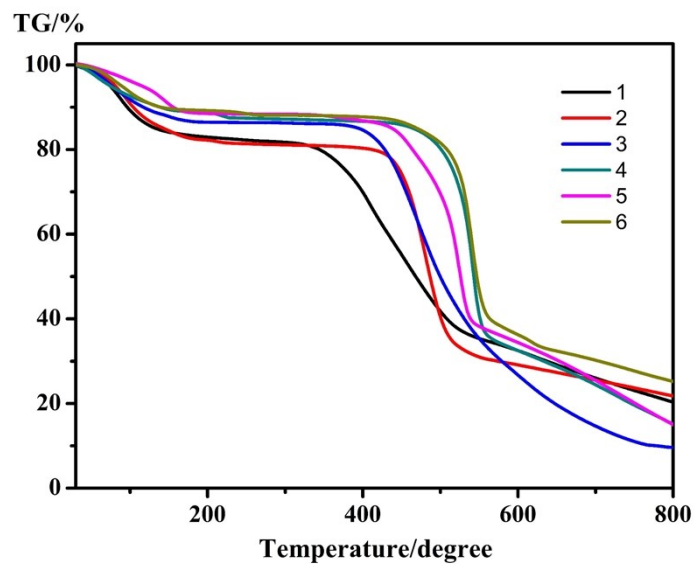

**Fig. S6** TG curve of 2-6.

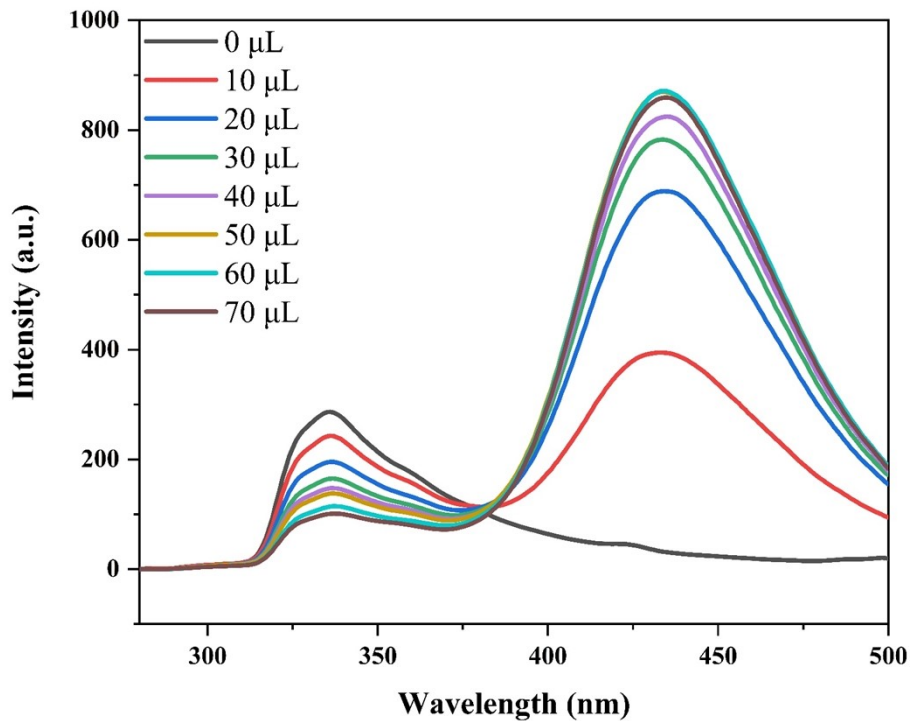

**Fig. S7** Change in emission intensities of 2 with the gradual addition of NFX.

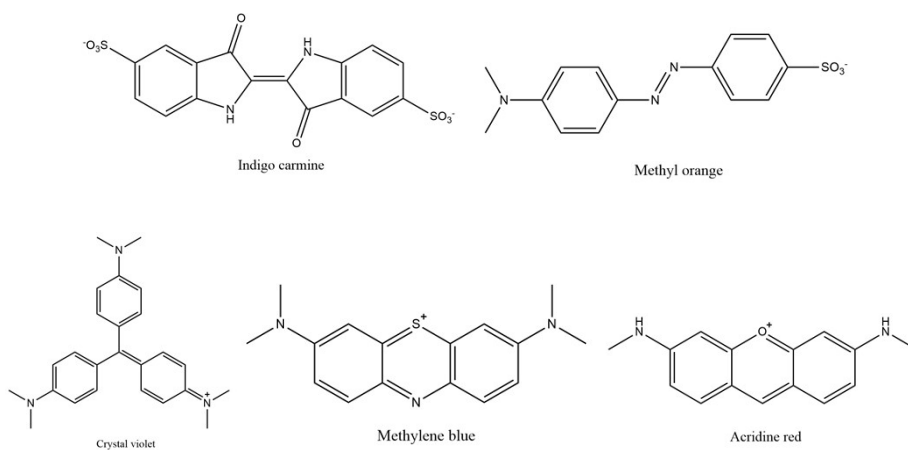

**Fig.S8** The structure of the dyes used in this work.

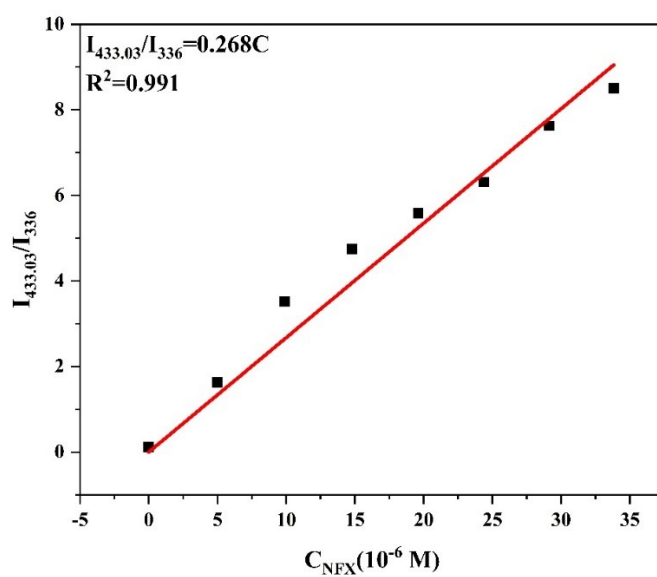

**Fig. S9** Linear relationship between different concentrations of NFX and value of  $I_{433}/I_{336}$ .

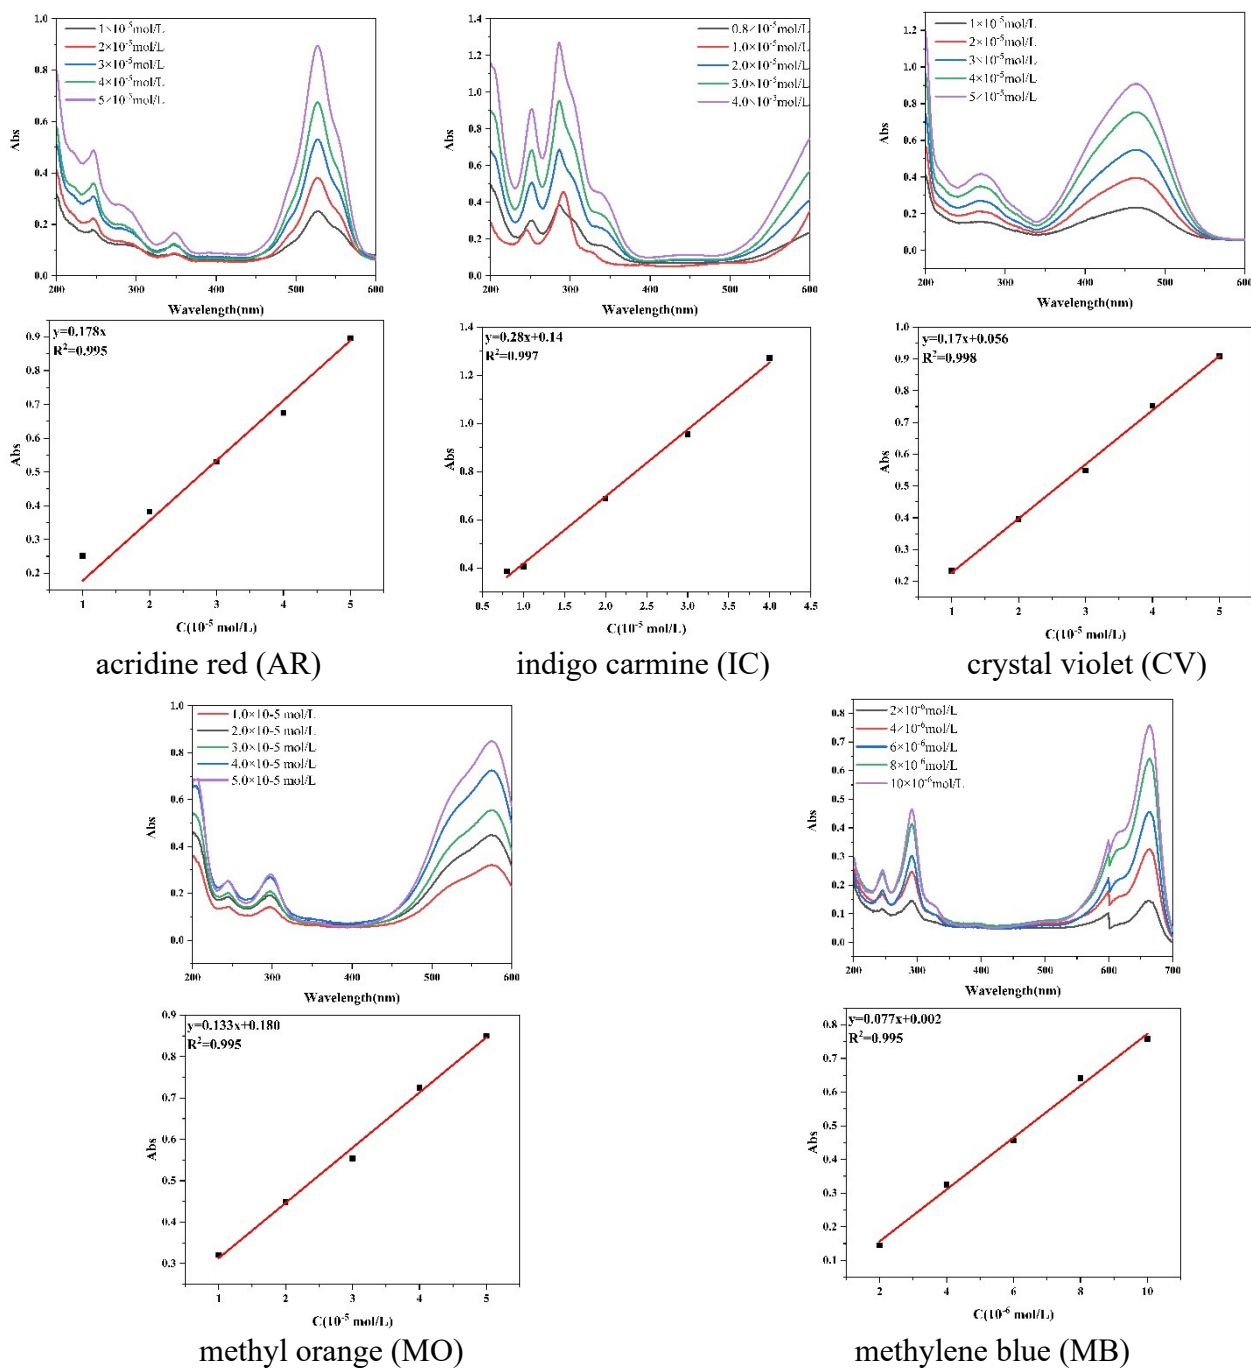

**Fig S10.** The standard curve of the five dyes including acridine red (AR), indigo carmine (IC), crystal violet (CV), methyl orange (MO) and methylene blue (MB).

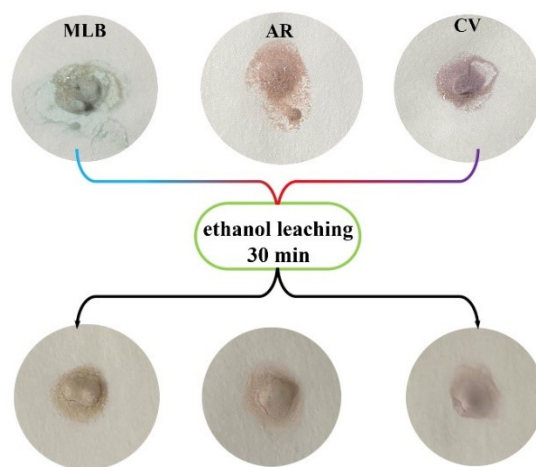

**Fig S11.** Compound 2 adsorbing cationic dye has been recycled and regenerate through ethanol leaching.
